# Supplementary material
Source: PubMed Central journal article supplement (PMC2792919)
Supplement: NIHMS106277-supplement-01.pdf [file NIHMS106277-supplement-01.pdf]

**TABLE S1.** Starting and extrapolated specific activities of infused [U-<sup>14</sup>C]glutamate and [U-<sup>14</sup>C]glutamine in the interstitial space of the rat brain

| Substrate                     | dpm/h       | Original specific activity of substrate (dpm/pmol) | Extrapolated specific activity (dpm/pmol) | pmol/h   |
|-------------------------------|-------------|----------------------------------------------------|-------------------------------------------|----------|
| [U- <sup>14</sup> C]Glutamate | 2,670 ± 396 | 408 ± 8                                            | 59 ± 18                                   | 45 ± 7   |
| [U- <sup>14</sup> C]Glutamine | 504 ± 99    | 378 ± 1                                            | 2.1 ± 0.5                                 | 240 ± 47 |

Results are given as means ± SD (n=4). Reproduced with permission (Zielke *et al.* 1998).
