# Supplementary material
Source: PubMed Central journal article supplement (PMC2792919)

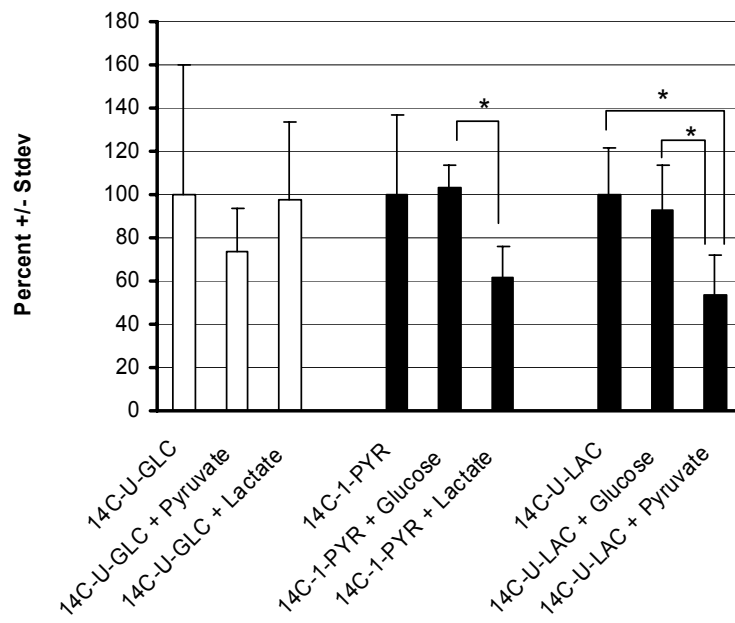

Figure 1

Supplement: NIHMS106277-supplement-Supp_Fig_S1.pdf [file NIHMS106277-supplement-Supp_Fig_S1.pdf]

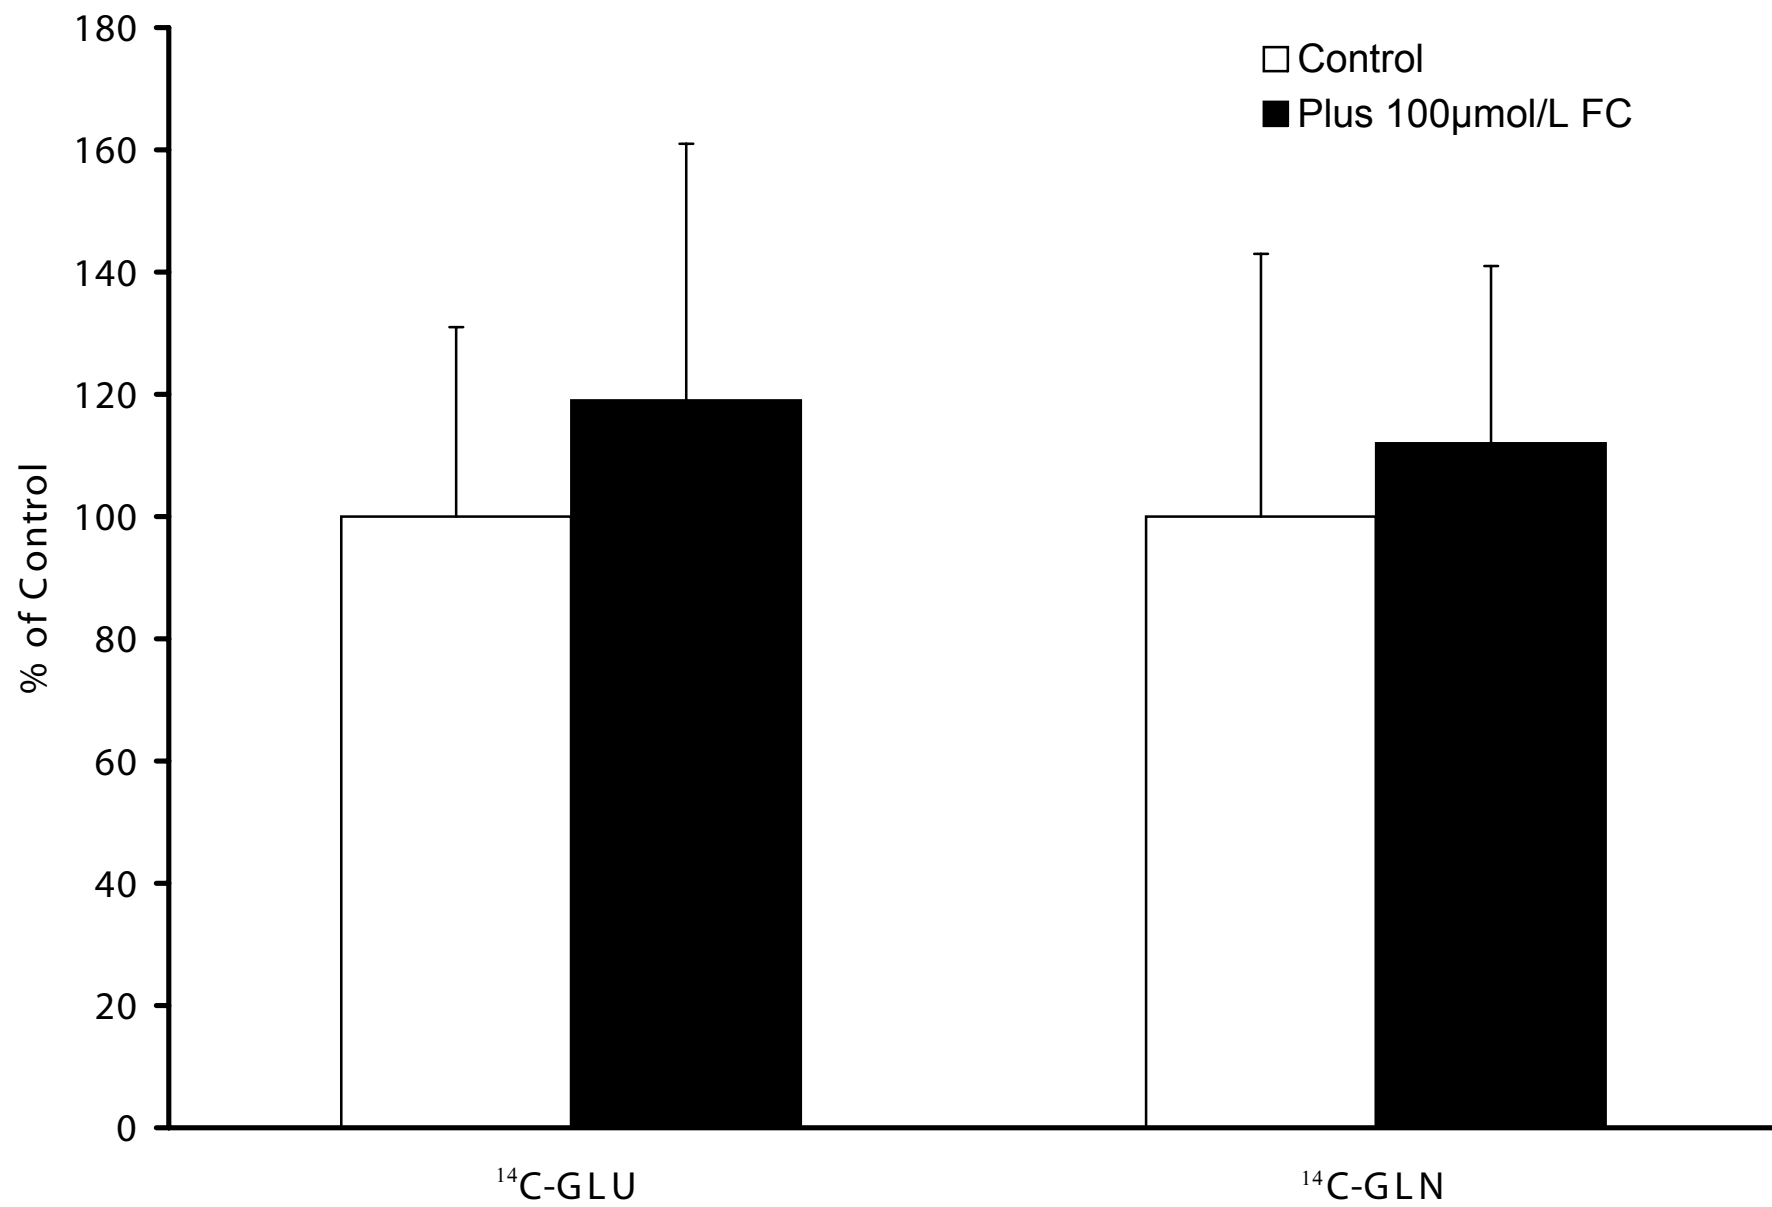

Supplement: NIHMS106277-supplement-Supp_Fig_S2.pdf [file NIHMS106277-supplement-Supp_Fig_S2.pdf]

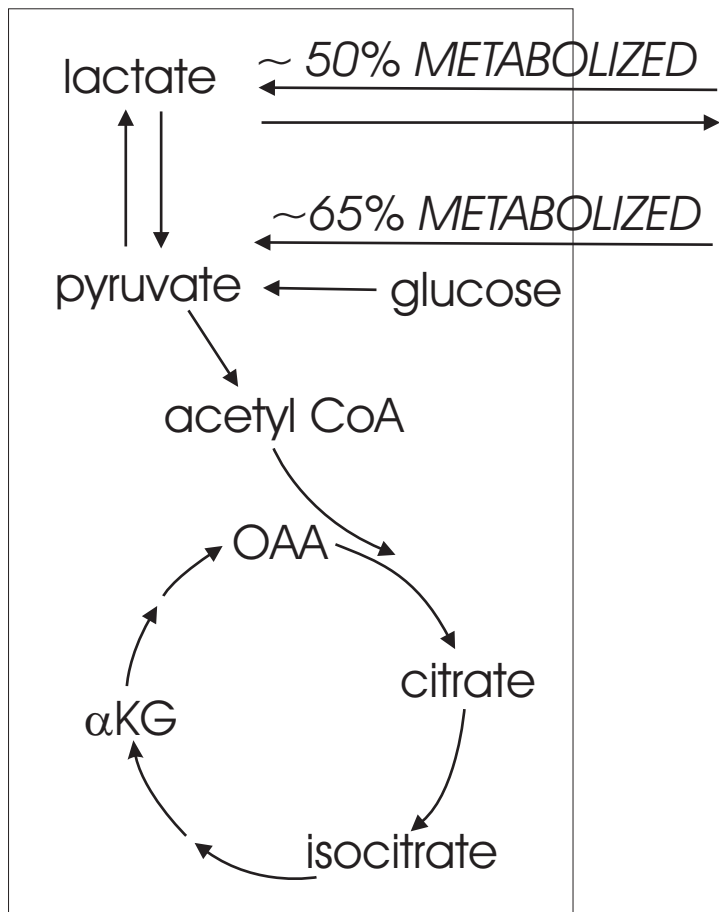

NEURON

**INTERSTITIAL**  
 $^{14}$ **C-LACTATE**  
**INTERSTITIAL**  
 $^{14}$ **C-GLUCOSE**

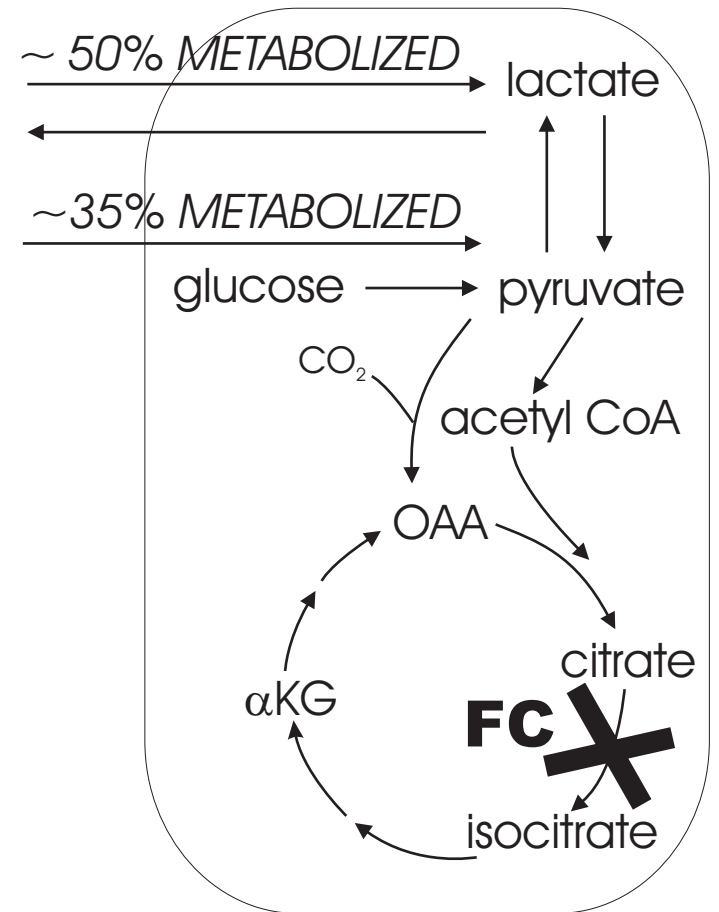

ASTROCYTE

Supplement: NIHMS106277-supplement-Supp_Fig_S3.pdf [file NIHMS106277-supplement-Supp_Fig_S3.pdf]
